# Supplementary material for: A novel approach to determine estrogenic hormones in swine lagoon wastewater using the QuEChERS method combined with solid phase extraction and LC/MS/MS analysis
Source: Royal Society of Chemistry journal article supplement (doi:10.1039/c4ay01804d), 2014-09-23
Supplement: c4ay01804d1.pdf [file c4ay01804d1.pdf]

Supporting information

1. Details of the collected lagoon water samples

| Location     | Sample ID | Sample name                 | Collection month |
|--------------|-----------|-----------------------------|------------------|
| Hog lagoon 1 | HL-1      | Lagoon water                | August           |
| Hog lagoon 1 | HL-2      | Center pivot spray          | August           |
| Hog lagoon 1 | HL-3      | Center pivot spray          | August           |
| Hog lagoon 1 | HL-4      | Center pivot spray          | August           |
| Hog lagoon 2 | HL-5      | Lagoon water                | September        |
| Hog lagoon 2 | HL-6      | Lagoon water from pump      | September        |
| Hog lagoon 2 | HL-7      | Traveling gun spray         | September        |
| Hog lagoon 3 | HL-8      | Traveling gun spray         | September        |
| Hog lagoon 3 | HL-9      | Lagoon water (lower lagoon) | September        |
| Hog lagoon 3 | HL-10     | Lagoon water (upper lagoon) | September        |
| Hog lagoon 1 | HL-11     | Lagoon water                | December         |
| Hog lagoon 2 | HL-12     | Lagoon water                | December         |
| Hog lagoon 3 | HL-13     | Lagoon water (lower lagoon) | December         |
| Hog lagoon 3 | HL-14     | Lagoon water (upper lagoon) | December         |
| Hog lagoon 1 | HL-15     | Lagoon water                | March            |
| Hog lagoon 2 | HL-16     | Lagoon water                | March            |
| Hog lagoon 3 | HL-17     | Lagoon water (lower lagoon) | March            |
| Hog lagoon 3 | HL-18     | Lagoon water (upper lagoon) | March            |

2. Lagoon water analyses (n=3) complete data (Concentrations in ng/L units)

|                              |               | HL 1           | HL 2           | HL 3           | HL 4          | HL 5           | HL 6           | HL 7           | HL 8           | HL 9      | HL 10          | HL 11          | HL 12          | HL 13          | HL 14          | HL 15          | HL 16          | HL 17          | HL 18          |
|------------------------------|---------------|----------------|----------------|----------------|---------------|----------------|----------------|----------------|----------------|-----------|----------------|----------------|----------------|----------------|----------------|----------------|----------------|----------------|----------------|
| E3 (ng/L)                    | Aqueous phase | 8.34 (1.02)    | <LOQ           | ND             | 11.36 (0.28)  | ND             | ND             | ND             | ND             | ND        | ND             | ND             | ND             | ND             | ND             | 13.74 (1.68)   | ND             | ND             | ND             |
|                              | Residue       | <LOQ           | <LOQ           | ND             | <LOQ          | ND             | ND             | ND             | ND             | ND        | ND             | <LOQ           | ND             | ND             | ND             | <LOQ           | ND             | ND             | ND             |
|                              | <b>Total</b>  | <b>8.34</b>    | <b>&lt;LOQ</b> | <b>ND</b>      | <b>11.36</b>  | <b>ND</b>      | <b>ND</b>      | <b>ND</b>      | <b>ND</b>      | <b>ND</b> | <b>ND</b>      | <b>ND</b>      | <b>&lt;LOQ</b> | <b>ND</b>      | <b>ND</b>      | <b>ND</b>      | <b>13.74</b>   | <b>ND</b>      | <b>ND</b>      |
| EE2 (ng/L)                   | Aqueous phase | ND             | ND             | ND             | ND            | ND             | ND             | ND             | ND             | ND        | ND             | ND             | ND             | ND             | ND             | ND             | ND             | ND             | ND             |
|                              | Residue       | ND             | ND             | ND             | ND            | ND             | ND             | ND             | ND             | ND        | ND             | ND             | ND             | ND             | ND             | ND             | ND             | ND             | ND             |
|                              | <b>Total</b>  | <b>ND</b>      | <b>ND</b>      | <b>ND</b>      | <b>ND</b>     | <b>ND</b>      | <b>ND</b>      | <b>ND</b>      | <b>ND</b>      | <b>ND</b> | <b>ND</b>      | <b>ND</b>      | <b>ND</b>      | <b>ND</b>      | <b>ND</b>      | <b>ND</b>      | <b>ND</b>      | <b>ND</b>      | <b>ND</b>      |
| βE2 (ng/L)                   | Aqueous phase | <LOQ           | ND             | ND             | ND            | ND             | ND             | ND             | ND             | ND        | ND             | ND             | ND             | ND             | ND             | ND             | ND             | ND             | ND             |
|                              | Residue       | <LOQ           | <LOQ           | <LOQ           | ND            | <LOQ           | ND             | ND             | ND             | ND        | ND             | ND             | ND             | ND             | ND             | <LOQ           | ND             | ND             | ND             |
|                              | <b>Total</b>  | <b>&lt;LOQ</b> | <b>&lt;LOQ</b> | <b>&lt;LOQ</b> | <b>ND</b>     | <b>&lt;LOQ</b> | <b>ND</b>      | <b>ND</b>      | <b>ND</b>      | <b>ND</b> | <b>ND</b>      | <b>ND</b>      | <b>ND</b>      | <b>ND</b>      | <b>ND</b>      | <b>&lt;LOQ</b> | <b>ND</b>      | <b>ND</b>      | <b>ND</b>      |
| αE2 (ng/L)                   | Aqueous phase | <LOQ           | 16.84 (1.05)   | ND             | 28.95 (1.03)  | ND             | ND             | ND             | ND             | ND        | ND             | ND             | ND             | ND             | ND             | <LOQ           | <LOQ           | ND             | ND             |
|                              | Residue       | <LOQ           | <LOQ           | ND             | 7.91 (0.42)   | ND             | ND             | ND             | ND             | ND        | ND             | 13.54 (0.44)   | ND             | ND             | ND             | <LOQ           | ND             | ND             | ND             |
|                              | <b>Total</b>  | <b>&lt;LOQ</b> | <b>16.84</b>   | <b>ND</b>      | <b>36.86</b>  | <b>ND</b>      | <b>ND</b>      | <b>ND</b>      | <b>ND</b>      | <b>ND</b> | <b>ND</b>      | <b>13.54</b>   | <b>ND</b>      | <b>ND</b>      | <b>ND</b>      | <b>&lt;LOQ</b> | <b>&lt;LOQ</b> | <b>ND</b>      | <b>ND</b>      |
| E1 (ng/L)                    | Aqueous phase | 25.73 (5.01)   | 21.09 (1.63)   | <LOQ           | 70.05 (3.22)  | 6.89 (0.53)    | <LOQ           | <LOQ           | <LOQ           | ND        | <LOQ           | <LOQ           | ND             | <LOQ           | ND             | 35.21 (7.76)   | 8.51 (1.67)    | <LOQ           | <LOQ           |
|                              | Residue       | 24.42 (4.51)   | 31.51 (1.51)   | <LOQ           | 36.29 (2.13)  | <LOQ           | <LOQ           | <LOQ           | <LOQ           | ND        | ND             | <LOQ           | <LOQ           | <LOQ           | <LOQ           | 21.44 (0.08)   | ND             | ND             | ND             |
|                              | <b>Total</b>  | <b>50.15</b>   | <b>52.60</b>   | <b>&lt;LOQ</b> | <b>106.34</b> | <b>6.89</b>    | <b>&lt;LOQ</b> | <b>&lt;LOQ</b> | <b>&lt;LOQ</b> | <b>ND</b> | <b>&lt;LOQ</b> | <b>&lt;LOQ</b> | <b>&lt;LOQ</b> | <b>&lt;LOQ</b> | <b>&lt;LOQ</b> | <b>56.65</b>   | <b>8.51</b>    | <b>&lt;LOQ</b> | <b>&lt;LOQ</b> |
| E1-<br>Conjugates<br>(ng/L)  | Aqueous phase | ND             | 4.86 (1.30)    | ND             | ND            | ND             | ND             | ND             | ND             | ND        | ND             | 56.33 (13.28)  | ND             | ND             | <LOQ           | 31.59 (4.35)   | <LOQ           | ND             | ND             |
| βE2-<br>Conjugates<br>(ng/L) | Aqueous phase | ND             | 8.80 (1.25)    | ND             | ND            | ND             | ND             | ND             | ND             | ND        | ND             | 19.37 (1.82)   | <LOQ           | ND             | <LOQ           | 6.00 (0.39)    | ND             | ND             | ND             |

ND = Not detected

<LOQ = Below the limit of quantification

4. Storm water analyses (n=3) complete data (Concentrations in ng/L units)

| Sample ID | E1          | $\alpha$ E2 | $\beta$ E2   | E3           | E1-<br>Conjugates | $\beta$ E2-<br>Conjugates |
|-----------|-------------|-------------|--------------|--------------|-------------------|---------------------------|
| SW-1      | 2.71 (0.09) | 2.60 (0.29) | ND           | ND           | 1.36 (0.15)       | ND                        |
| SW-2      | ND          | ND          | ND           | ND           | ND                | ND                        |
| SW-3      | ND          | ND          | ND           | ND           | ND                | ND                        |
| SW-4      | ND          | ND          | ND           | ND           | ND                | ND                        |
| SW-5      | ND          | ND          | ND           | ND           | 4.45 (0.23)       | ND                        |
| SW-6      | ND          | ND          | ND           | ND           | ND                | ND                        |
| SW-7      | ND          | ND          | ND           | ND           | ND                | ND                        |
| SW-8      | ND          | ND          | ND           | ND           | 1.36 (0.50)       | ND                        |
| SW-9      | ND          | ND          | ND           | ND           | 5.82 (0.04)       | ND                        |
| SW-10     | ND          | ND          | ND           | ND           | 2.58 (0.32)       | ND                        |
| SW-11     | ND          | ND          | ND           | ND           | 1.96 (0.02)       | ND                        |
| SW-12     | ND          | ND          | ND           | ND           | 3.16 (0.08)       | ND                        |
| SW-13     | ND          | ND          | ND           | ND           | ND                | ND                        |
| SW-14     | ND          | ND          | ND           | ND           | 3.66 (0.10)       | ND                        |
| SW-15     | ND          | ND          | ND           | ND           | 2.79 (0.02)       | ND                        |
| SW-16     | ND          | ND          | ND           | ND           | 3.82 (0.18)       | ND                        |
| SW-17     | ND          | ND          | ND           | ND           | 3.77 (0.12)       | ND                        |
| SW-18     | ND          | ND          | ND           | ND           | 3.61 (0.23)       | ND                        |
| SW-19     | ND          | ND          | ND           | 15.77 (1.09) | 3.31 (0.07)       | ND                        |
| SW-20     | ND          | ND          | ND           | 23.08 (3.57) | ND                | ND                        |
| SW-21     | 2.99 (0.09) | ND          | ND           | ND           | 2.24 (0.43)       | ND                        |
| SW-22     | ND          | ND          | ND           | ND           | 3.04 (0.32)       | ND                        |
| SW-23     | ND          | ND          | ND           | 5.12 (0.25)  | 1.40 (0.56)       | ND                        |
| SW-24     | 9.90 (0.25) | ND          | 20.89 (0.03) | ND           | 3.19 (0.73)       | ND                        |
| SW-25     | ND          | ND          | 21.96 (0.90) | 7.54 (0.05)  | 2.74 (0.71)       | ND                        |
| SW-26     | 8.03 (0.68) | ND          | 35.92 (0.21) | ND           | <LOQ              | ND                        |
